# Supplementary material for: Ultrafast synthesis of stabilized gold nanoparticles using aqueous fruit extract of Limonia acidissima L. and conjugated epirubicin: targeted drug delivery for treatment of breast cancer
Source: Royal Society of Chemistry journal article supplement (doi:10.1039/c6ra01482h), 2016-01-01

## Step-1: Fruit extract of *Limonia acidissima* L.

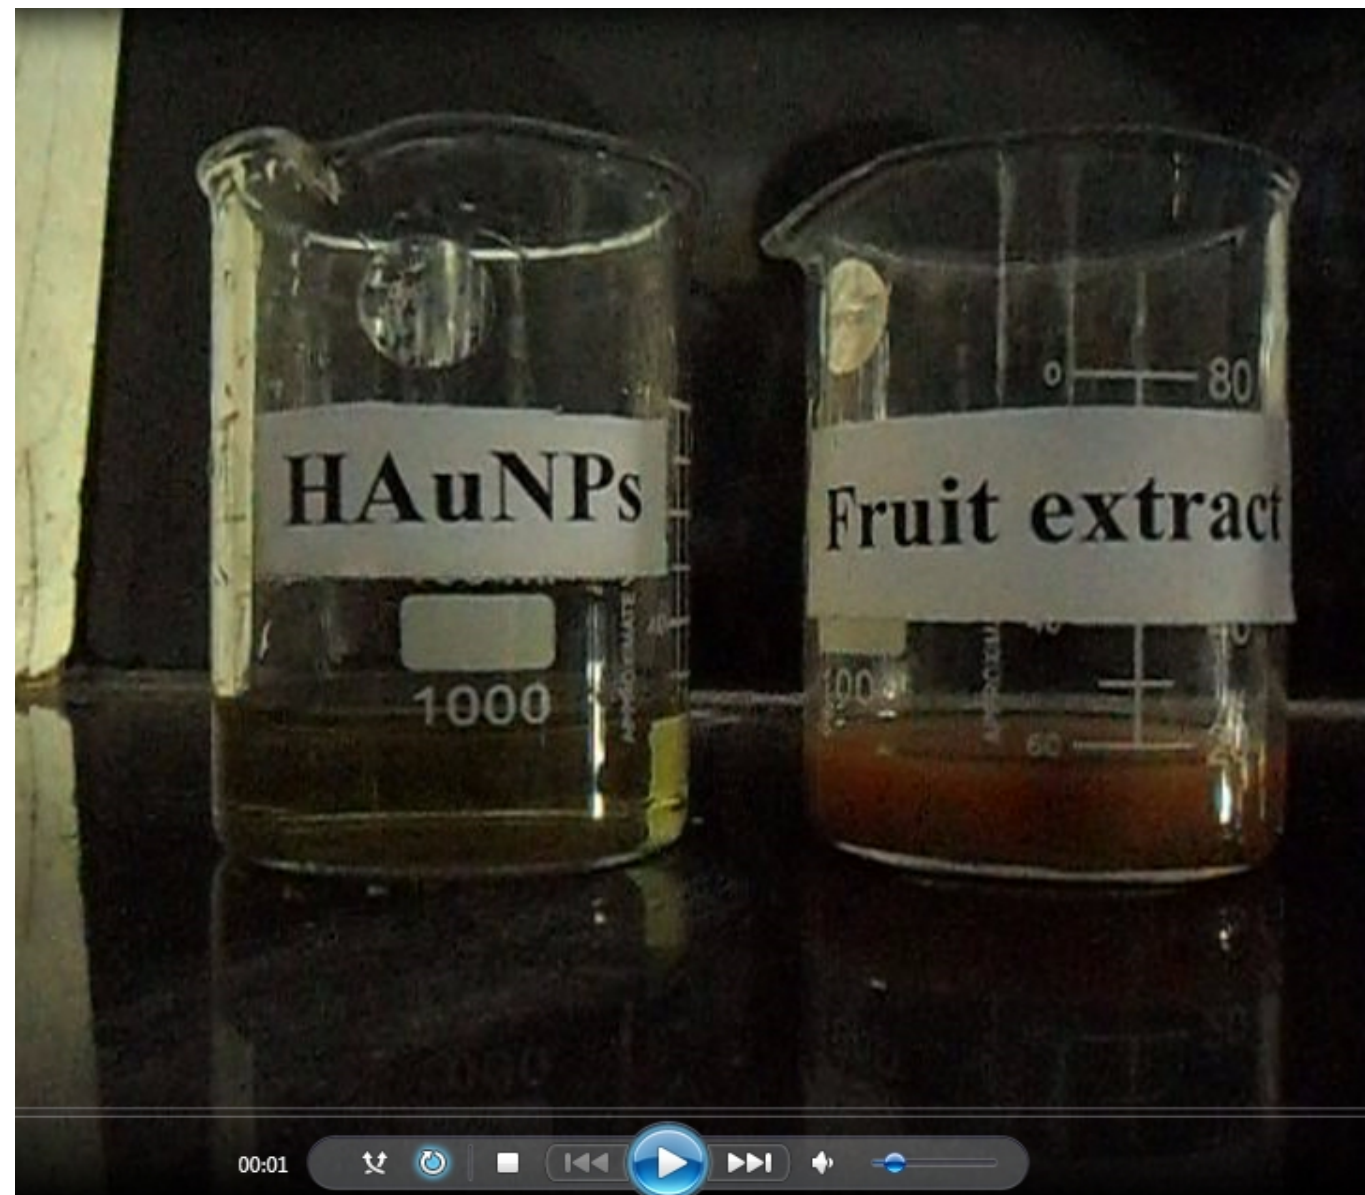

**Step-2: Fruit extract of *Limonia acidissima* L mixed with gold ions ( $\text{Au}^{3+}$ ) solution**

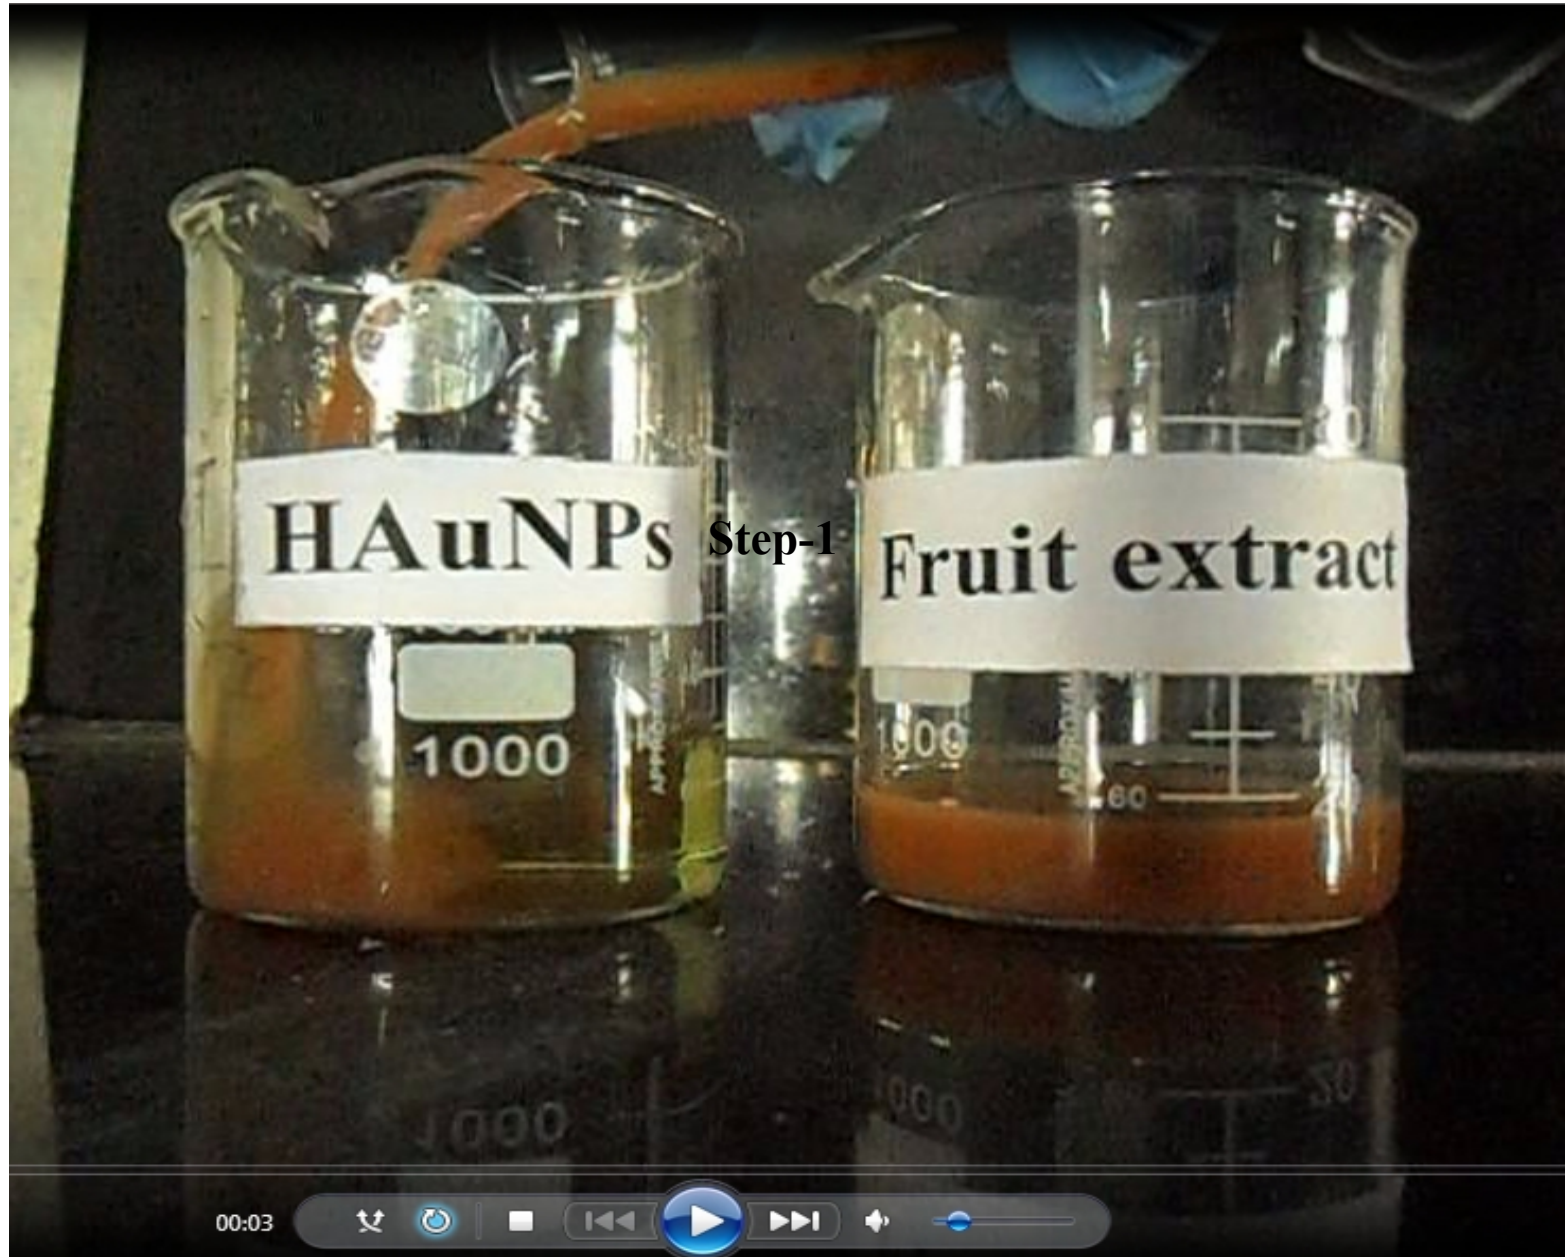

**Step-3:** Solution containing gold ions ( $\text{Au}^{3+}$ ) and (*Limonia acidissima* L) turned into wine red within 30 seconds

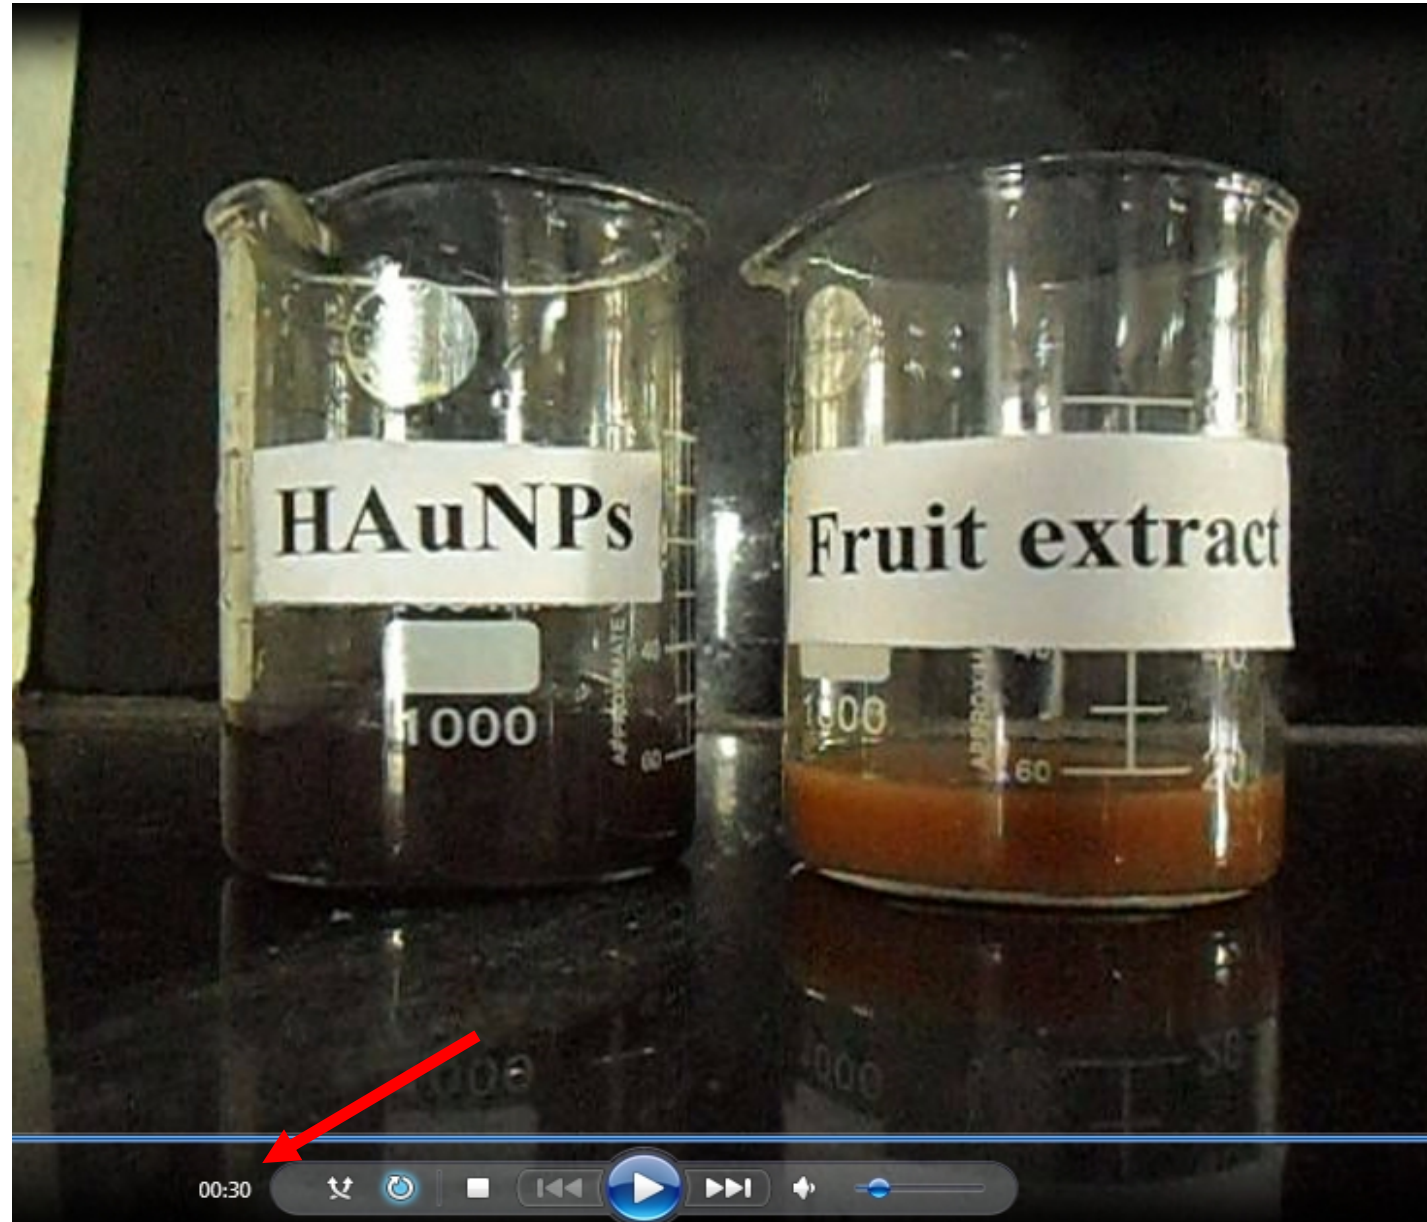

Supplement: c6ra01482h3.pdf [file c6ra01482h3.pdf]
